# Supplementary material for: ZMYND8 protects breast cancer stem cells against oxidative stress and ferroptosis through activation of NRF2
Source: PubMed Central journal article supplement (PMC10940091; doi:10.1172/jci171166), 2024-01-23
Supplement: jci-134-171166-s070.pdf [file jci-134-171166-s070.pdf]

## Supplemental Data

### **ZMYND8 Protects Breast Cancer Stem Cells against Oxidative Stress and Ferroptosis through Activation of NRF2**

Maowu Luo <sup>1</sup>, Lei Bao <sup>1</sup>, Yuanyuan Xue <sup>2</sup>, Ming Zhu <sup>1</sup>, Ashwani Kumar <sup>3</sup>, Chao Xing <sup>3,4</sup>,  
Jennifer E. Wang <sup>1</sup>, Yingfei Wang <sup>1,5,6,7</sup>, Weibo Luo <sup>1,8\*</sup>

<sup>1</sup> Department of Pathology,

<sup>2</sup> Children's Medical Center Research Institute,

<sup>3</sup> Eugene McDermott Center for Human Growth and Development,

<sup>4</sup> Lyda Hill Department of Bioinformatics,

<sup>5</sup> Department of Neurology,

<sup>6</sup> Peter O'Donnell Jr. Brain Institute,

<sup>7</sup> Cecil H. and Ida Green Center for Reproductive Biology Sciences,

<sup>8</sup> Department of Pharmacology,

UT Southwestern Medical Center, Dallas, TX, USA.

**Supplemental Table 1. Oligos used for generation of NRF2 KO cells.**

|           | <b>Forward</b>            | <b>Reverse</b>            |
|-----------|---------------------------|---------------------------|
| KO1 sgRNA | CACCGCATACCGTCTAAATCAACAG | AAACCTGTTGATTTAGACGGTATGC |
| KO2 sgRNA | CACCGCACATCCAGTCAGAAACCAG | AAACCTGGTTTCTGACTGGATGTGC |

**Supplemental Table 2. RT-qPCR primers used in this paper.**

| <b>Gene</b>    | <b>Forward primer sequence</b> | <b>Reverse primer sequence</b> | <b>Species</b> |
|----------------|--------------------------------|--------------------------------|----------------|
| <i>GSTP1</i>   | TTGGGCTCTATGGGAAGGAC           | GGGAGATGTATTTGCAGCGGA          | Human          |
| <i>NQO1</i>    | GAAGAGCACTGATCGTACTGGC         | GGATACTGAAAGTTCGCAGGG          | Human          |
| <i>GPX2</i>    | GAATGGGCAGAACGAGCATC           | CCGGCCCTATGAGGAACTTC           | Human          |
| <i>GCLC</i>    | GGCACAAGGACGTTCTCAAGT          | CAGACAGGACCAACCGGAC            | Human          |
| <i>GCLM</i>    | CATTTACAGCCTTACTGGGAGG         | ATGCAGTCAAATCTGGTGGCA          | Human          |
| <i>TXNRD1</i>  | ATGGGCAATTTATTGGTCCTCAC        | CCCAAGTAACGTGGTCTTTTTCAC       | Human          |
| <i>SRXN1</i>   | CAGGGAGGTGACTACTTCTACTC        | CAGGTACACCCTTAGGTCTGA          | Human          |
| <i>SLC3A2</i>  | TGAATGAGTTAGAGCCCGAGA          | GTCTTCCGCCACCTTGATCTT          | Human          |
| <i>SLC7A11</i> | GGTCCATTACCAGCTTTTGTACG        | AATGTAGCGTCCAAATGCCAG          | Human          |
| <i>GPX4</i>    | GAGGCAAGACCGAAGTAAACTAC        | CCGAACTGGTTACACGGGAA           | Human          |
| <i>KEAP1</i>   | CTGGAGGATCATACCAAGCAGG         | GGATACCCTCAATGGACACCAC         | Human          |
| <i>NFE2L2</i>  | TTCCCGGTCACATCGAGAG            | TCCTGTTGCATACCGTCTAAATC        | Human          |
| <i>Gstp1</i>   | ATGCCACCATACACCATTGTC          | GGGAGCTGCCCATACAGAC            | Mouse          |
| <i>Gpx2</i>    | GCCTCAAGTATGTCCGACCTG          | GGAGAACGGGTCATCATAAGGG         | Mouse          |
| <i>Gclc</i>    | GGGGTGACGAGGTGGAGTA            | GTTGGGGTTTGTCTCTCCC            | Mouse          |
| <i>Txnr1</i>   | CCCACTTGCCCCAACTGTT            | GGGAGTGTCTTGGAGGGAC            | Mouse          |
| <i>Srxn1</i>   | ATCGTGGTGCTGGATTGATTC          | CACCCAGAGATAAGATTACCCA         | Mouse          |
| <i>Gclm</i>    | AGGAGCTTCGGGACTGTATCC          | GGGACATGGTGCATTCCAAAA          | Mouse          |
| <i>Slc3a2</i>  | GGTCGCGGCTAAGTTCACC            | GCCCGAACGATGATAACCAC           | Mouse          |
| <i>Slc7a11</i> | GGCACCGTCATCGGATCAG            | CTCCACAGGCAGACCAGAAAA          | Mouse          |
| <i>Gpx4</i>    | GCCTGGATAAGTACAGGGGTT          | CATGCAGATCGACTAGCTGAG          | Mouse          |
| <i>ZMYND8</i>  | GGGTTTATCACGCTAAGTGTCTG        | GGCTTTACTCTGGGTCTCGATG         | Human          |
| <i>18sRNA</i>  | CGGCGACGACCCATTTCGAAC          | GAATCGAACCCCTGATTCCCCGTC       | Human/Mouse    |

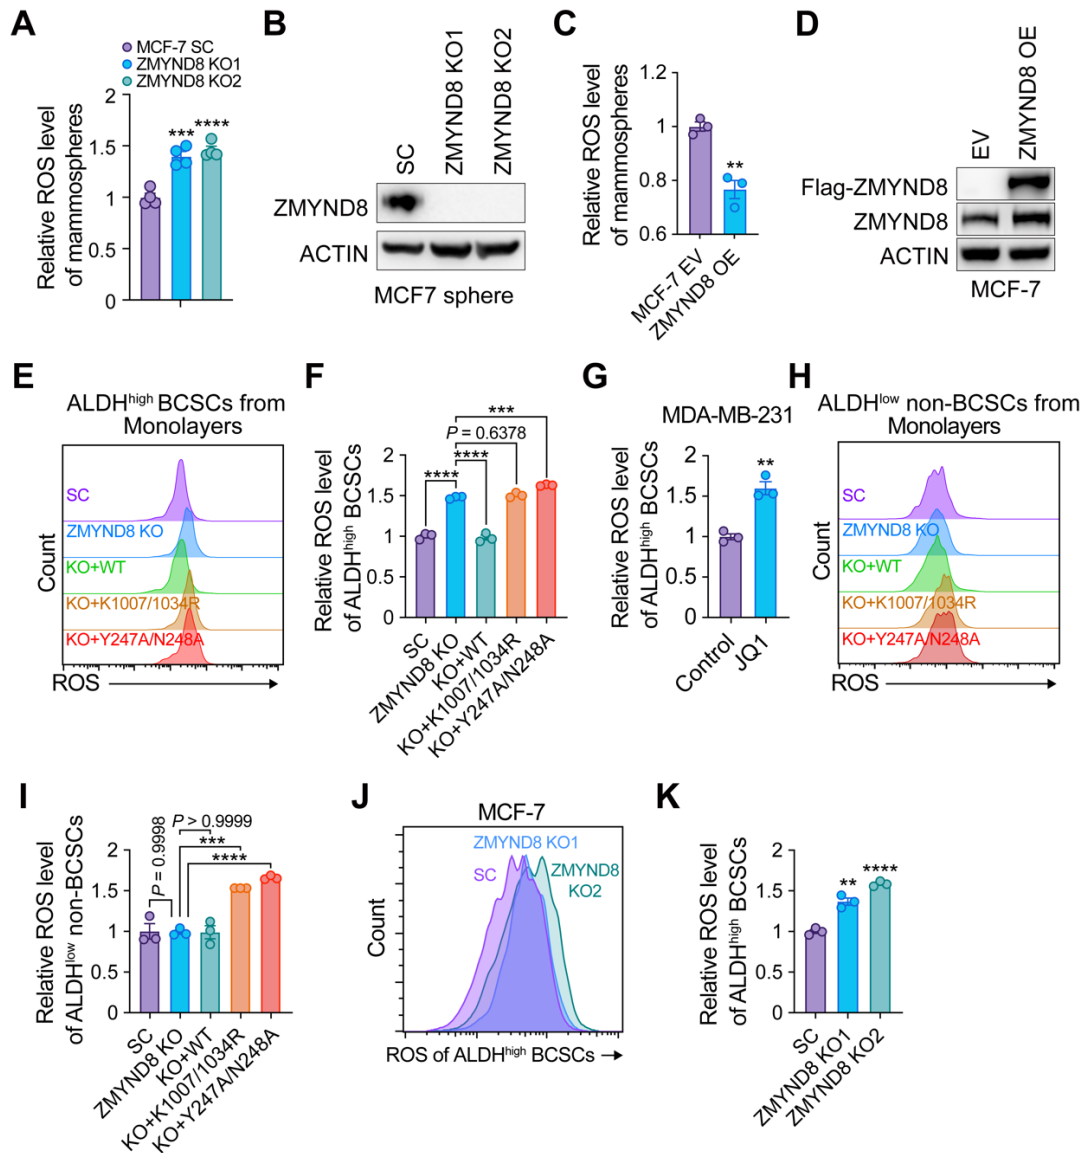

**Supplemental Figure 1. Loss of ZMYND8 increases ROS in ALDH<sup>high</sup> BCSCs.** (A) Relative ROS levels in MCF-7-SC, ZMYND8 KO1, and ZMYND8 KO2 mammospheres ( $n = 4$ ). (B) Analysis of ZMYND8 protein levels in MCF-7-SC, ZMYND8 KO1, and ZMYND8 KO2 mammospheres ( $n = 3$ ). (C) Relative ROS levels in MCF-7 mammospheres expressing EV or WT ZMYND8 ( $n = 3$ ). (D) Analysis of ZMYND8 protein levels in MCF-7 mammospheres expressing EV or WT ZMYND8 ( $n = 3$ ). (E and F) Relative ROS levels in ALDH<sup>high</sup> cells from MDA-MB-231-SC, ZMYND8 KO, ZMYND8 KO rescued with WT ZMYND8, K1007/1034R, or Y247A/N248A monolayers ( $n = 3$ ). (G) Relative ROS levels in ALDH<sup>high</sup> BCSCs from MDA-MB-231 cells treated with vehicle or JQ1 for four days ( $n = 3$ ). (H and I) Relative ROS levels in ALDH<sup>low</sup> non-BCSCs from MDA-MB-231-SC, ZMYND8 KO, ZMYND8 KO rescued with WT ZMYND8, K1007/1034R, or Y247A/N248A monolayers ( $n = 3$ ). (J and K) Relative ROS levels in ALDH<sup>high</sup> BCSCs from MCF-7-SC, ZMYND8 KO1, and ZMYND8 KO2 cells ( $n = 3$ ). Data represent mean  $\pm$  SEM.  $P$  value was determined by using one-way ANOVA corrected with Dunnett's test (A and K) or with Tukey's test (F and I), and two-tailed Student's  $t$  test (C and G). \*\* $p < 0.01$ ; \*\*\* $p < 0.001$ ; \*\*\*\* $p < 0.0001$ .

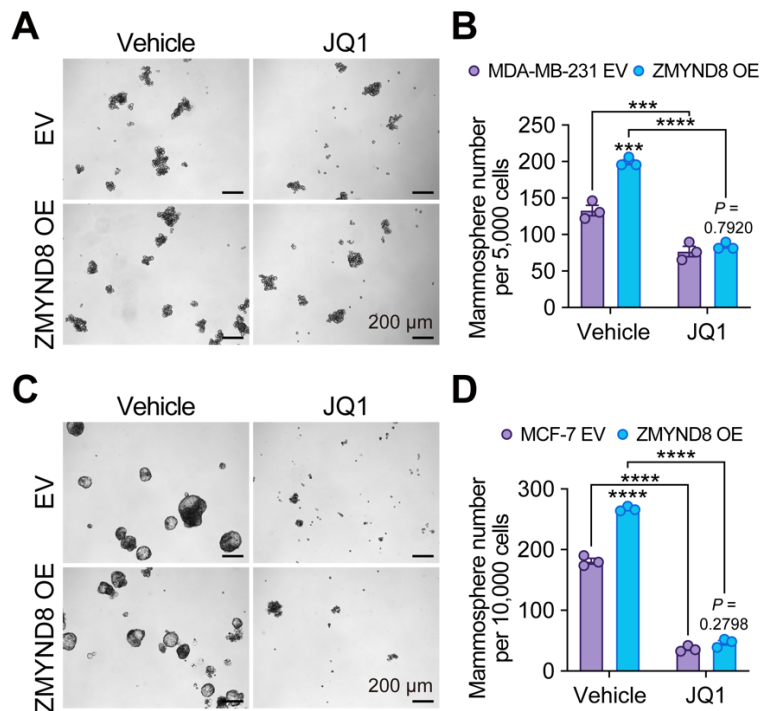

**Supplemental Figure 2. Treatment of JQ1 blocks ZMYND8-induced mammosphere formation.** (A and B) Formation of MDA-MB-231 mammospheres expressing EV or WT ZMYND8 treated with vehicle or JQ1. Representative mammosphere images (A). Quantification of mammosphere numbers (B,  $n = 3$ ). (C and D) Formation of MCF-7 mammospheres expressing EV or WT ZMYND8 treated with vehicle or JQ1. Representative mammosphere images (C). Quantification of mammosphere numbers (D,  $n = 3$ ). Data represent mean  $\pm$  SEM.  $P$  value was determined using two-way ANOVA corrected with Tukey's test (B and D). \*\*\* $p < 0.001$ ; \*\*\*\* $p < 0.0001$ .

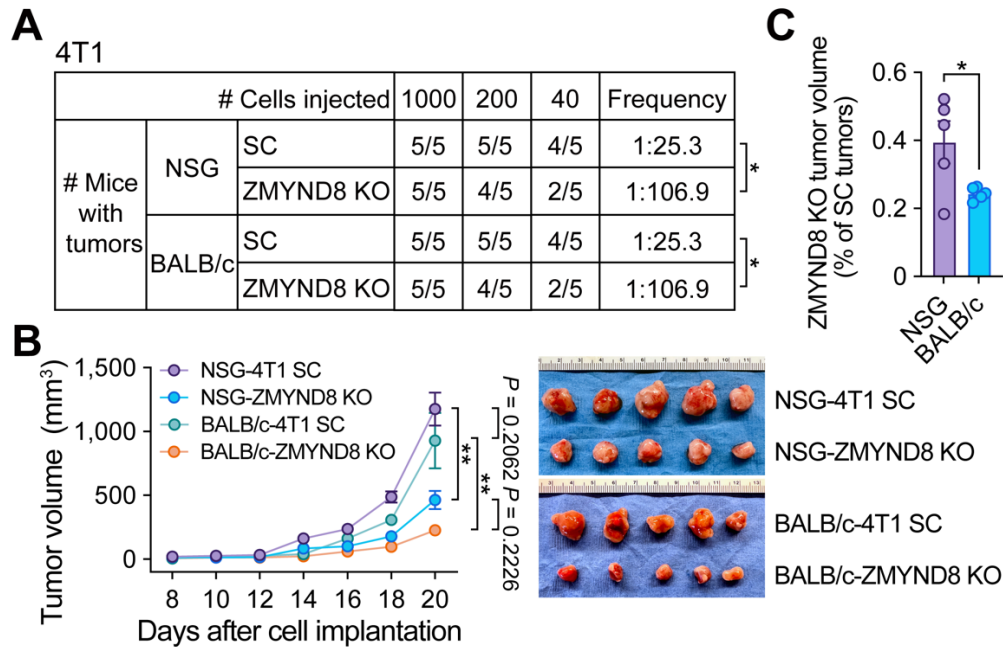

**Supplemental Figure 3. Effects of ZMYND8 on tumor initiation and growth in immunocompromised and immunocompetent mice.** (A) Limiting dilution assay of SC or ZMYND8 KO 4T1 cells in NSG and BALB/c mice. (B and C) SC or ZMYND8 KO 4T1 cells were implanted into the mammary fat pad of NSG and BALB/c mice ( $n = 5$ ), respectively. Tumor volume and image are shown (B). Tumor inhibition by ZMYND8 KO was quantified at post-implantation day 20 (C). Data represent mean  $\pm$  SEM.  $P$  value was determined by using chi-square test (A), two-way ANOVA corrected with Tukey's test (B), and two-tailed Student's  $t$  test (C). \* $p < 0.05$ ; \*\* $p < 0.01$ .

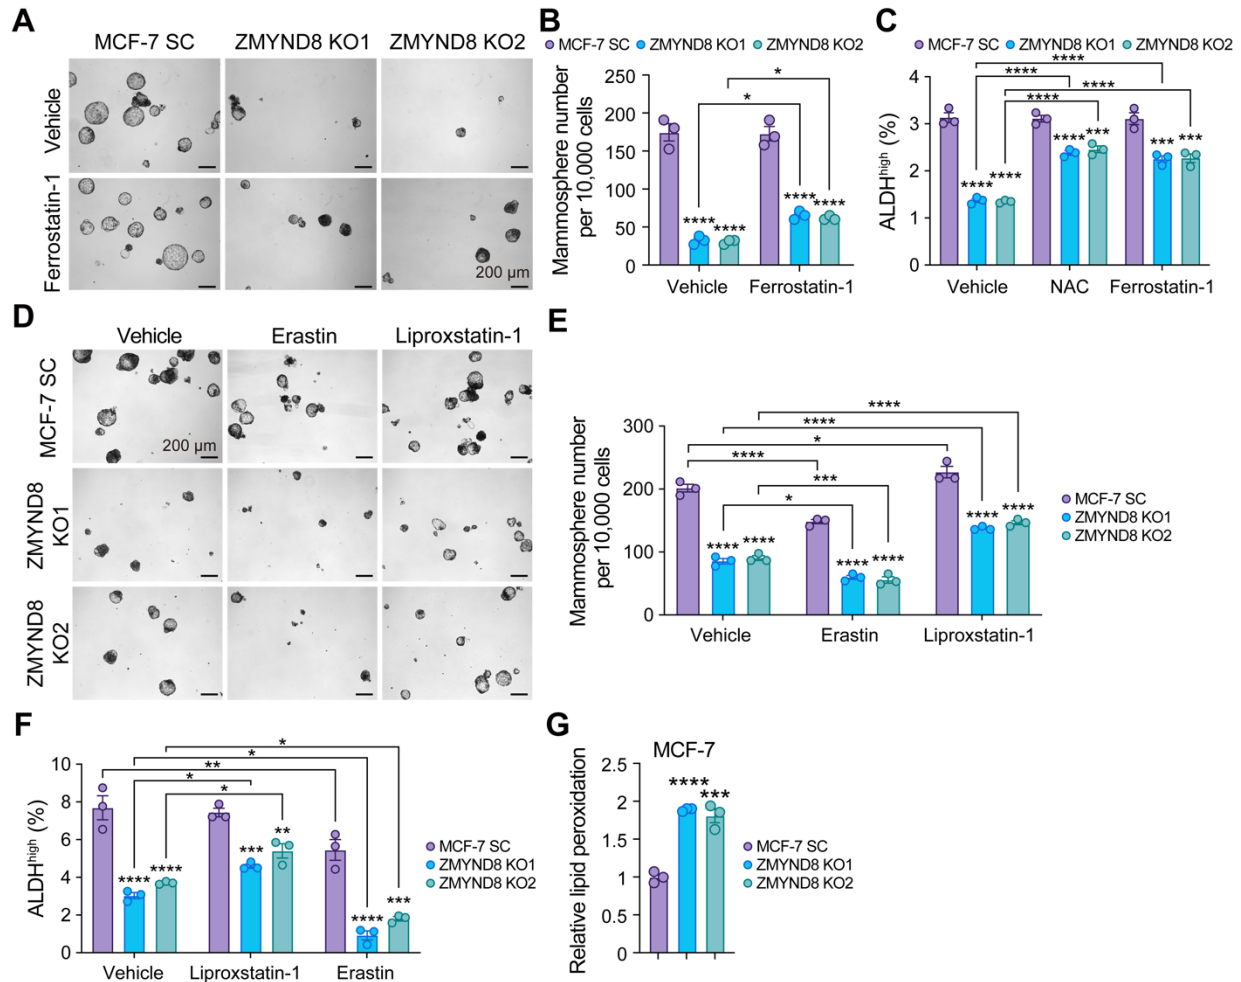

**Supplemental Figure 4. ZMYND8 inhibits ferroptosis in ALDH<sup>high</sup> BCSCs.** (A and B) Formation of MCF-7-SC and ZMYND8 KO1/2 mammospheres treated with vehicle or Ferrostatin-1. Representative mammosphere images (A). Quantification of mammosphere numbers (B,  $n = 3$ ). (C) Quantification of ALDH<sup>high</sup> BCSCs in MCF-7-SC and ZMYND8 KO1/2 cells treated with vehicle, NAC, or Ferrostatin-1 ( $n = 3$ ). (D and E) Formation of MCF-7-SC, ZMYND8 KO1, and ZMYND8 KO2 mammospheres treated with vehicle, Erastin, or Liproxstatin-1. Representative mammosphere images (D). Quantification of mammosphere numbers (E,  $n = 3$ ). (F) Quantification of ALDH<sup>high</sup> BCSCs in MCF-7-SC and ZMYND8 KO1/2 cells treated with vehicle, Liproxstatin-1, or Erastin ( $n = 3$ ). (G) Relative lipid peroxidation levels in MCF-7-SC and ZMYND8 KO1/2 mammospheres ( $n = 3$ ). Data represent mean  $\pm$  SEM.  $P$  value was determined by using two-way ANOVA corrected with Tukey's test (B, C, E, and F) and one-way ANOVA corrected with Dunnett's test (G). \* $p < 0.05$ ; \*\* $p < 0.01$ ; \*\*\* $p < 0.001$ ; \*\*\*\* $p < 0.0001$ .

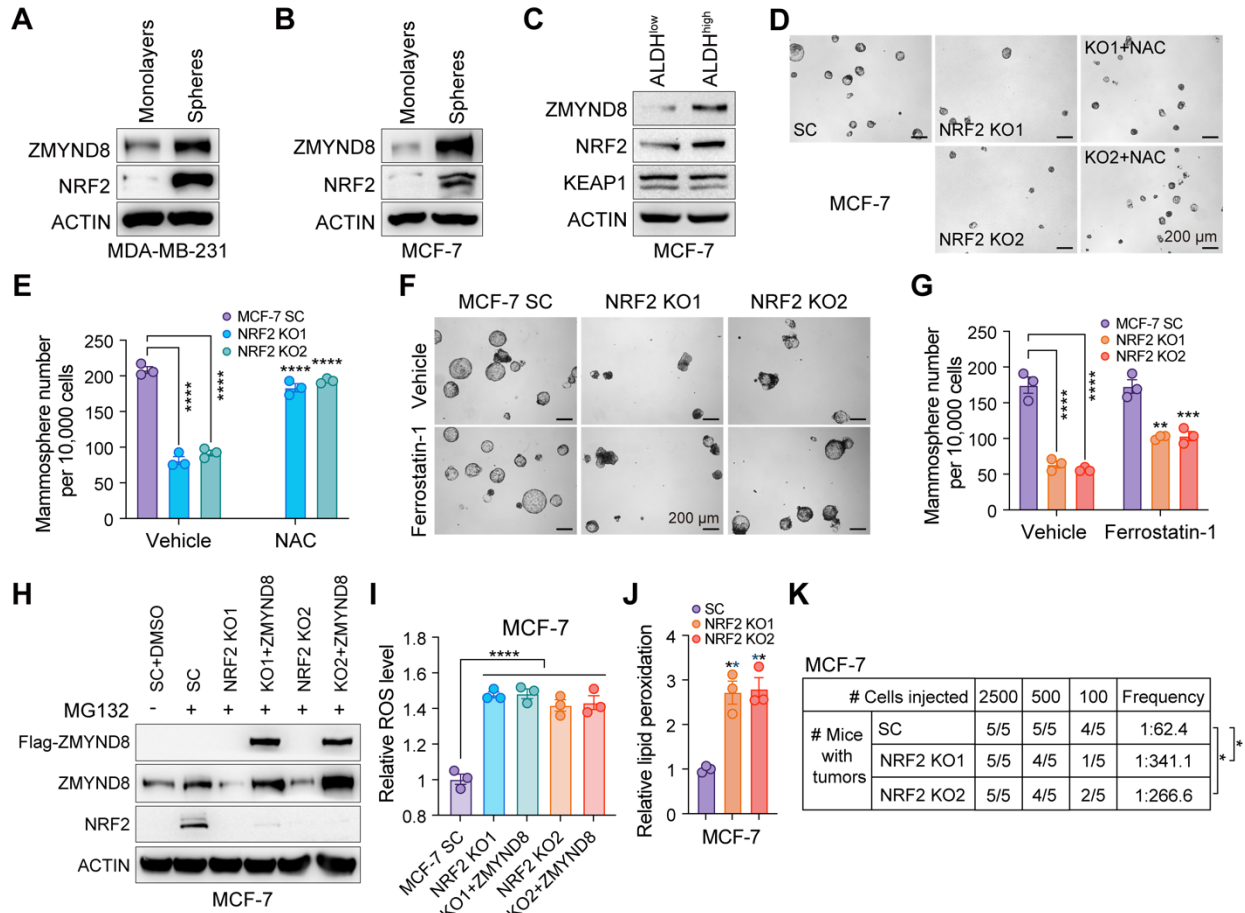

**Supplemental Figure 5. ZMYND8 inhibits ferroptosis in an NRF2-dependent manner.** (A and B) Analysis of ZMYND8 and NRF2 protein levels in MDA-MB-231 (A) and MCF-7 (B) mammospheres ( $n = 3$ ). (C) Analysis of ZMYND8, NRF2, and KEAP1 protein levels in ALDH<sup>high</sup> BCSCs and ALDH<sup>low</sup> non-BCSCs from MCF-7 cells ( $n = 3$ ). (D and E) Formation of MCF-7-SC, NRF2 KO1, and NRF2 KO2 mammospheres treated with vehicle or NAC. Representative mammosphere images (D). Quantification of mammosphere numbers (E,  $n = 3$ ). (F and G) Formation of MCF-7-SC, NRF2 KO1, and NRF2 KO2 mammospheres treated with vehicle or Ferrostatin-1. Representative mammosphere images (F). Quantification of mammosphere numbers (G,  $n = 3$ ). The experiments in Supplemental Figure 4A and 5F were carried out concomitantly with the same MCF-7-SC controls. (H) Analysis of ZMYND8 and NRF2 protein levels in MCF-7-SC, NRF2 KO1/2, NRF2 KO1/2 plus WT ZMYND8 cells treated with DMSO (-) or MG132 (+).  $n = 3$ . (I) Relative ROS levels in MCF-7-SC, NRF2 KO1/2, NRF2 KO1/2 plus WT ZMYND8 mammospheres ( $n = 3$ ). (J) Relative lipid peroxidation levels in MCF-7-SC, NRF2 KO1, and NRF2 KO2 mammospheres ( $n = 3$ ). (K) Limiting dilution assay of MCF-7-SC, NRF2 KO1, or NRF2 KO2 cells in NSG mice. Data represent mean ± SEM.  $P$  value was determined by using two-way ANOVA corrected with Tukey's test (E and G), one-way ANOVA corrected with Tukey's test (I) or Dunnett's test (J), and chi-square test (K). \* $p < 0.05$ ; \*\* $p < 0.01$ ; \*\*\* $p < 0.001$ ; \*\*\*\* $p < 0.0001$ .



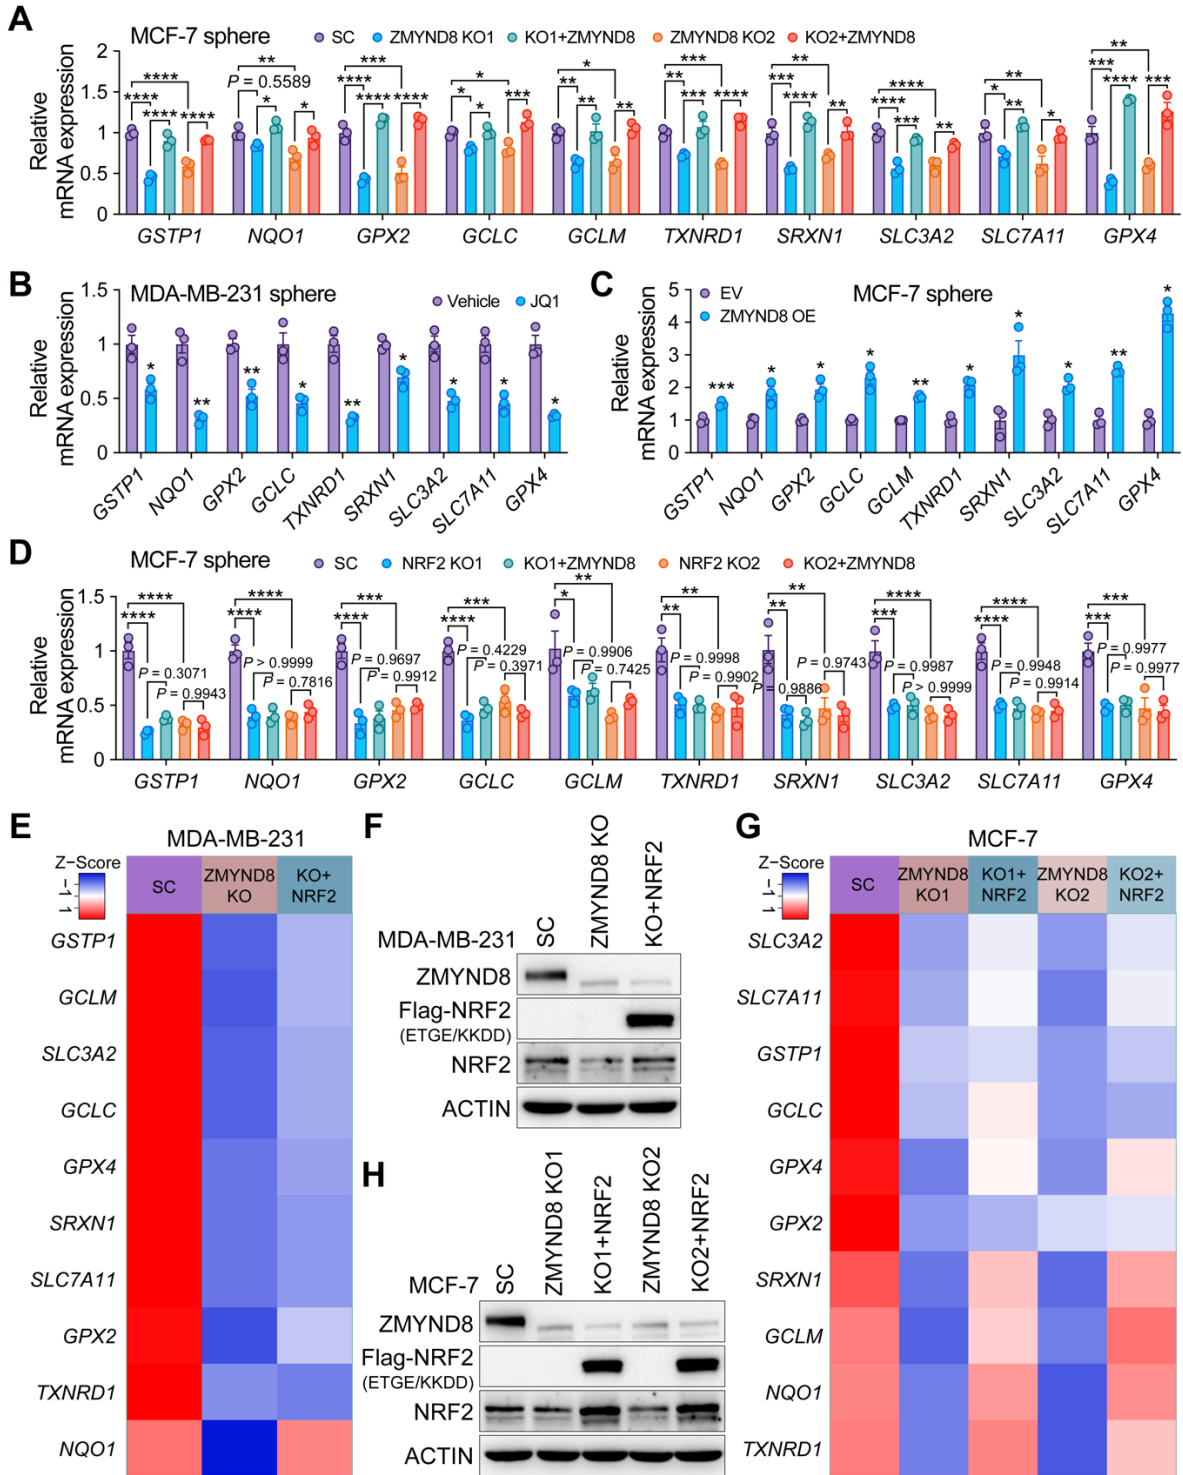

**Supplemental Figure 6. ZMYND8 enhances the transcription activity of NRF2.** (A) mRNA analysis of antioxidant genes in MCF-7-SC, ZMYND8 KO1/2, and ZMYND8 KO1/2 rescued with WT ZMYND8 mammospheres ( $n = 3$ ). (B) mRNA analysis of antioxidant genes in vehicle- or JQ1-treated MDA-MB-231 mammospheres ( $n = 3$ ). (C) mRNA analysis of antioxidant genes in MCF-7 mammospheres expressing EV or WT ZMYND8 ( $n = 3$ ). (D) mRNA analysis of antioxidant genes in MCF-7-SC, NRF2 KO1/2, and NRF2 KO1/2 plus WT ZMYND8

mammospheres ( $n = 3$ ). **(E and F)** Analysis of antioxidant gene mRNAs **(E)** and NRF2 and ZMYND8 protein levels **(F)** in MDA-MB-231-SC, ZMYND8 KO, and ZMYND8 KO plus NRF2-ETGE/KKDD mammospheres ( $n = 3$ ). **(G and H)** Analysis of antioxidant gene mRNAs **(G)** and NRF2 and ZMYND8 protein levels **(H)** in MCF-7-SC, ZMYND8 KO1/2, and ZMYND8 KO1/2 plus NRF2-ETGE/KKDD mammospheres ( $n = 3$ ). Data represent mean  $\pm$  SEM. *P* value was determined using one-way ANOVA corrected with Tukey's test **(A and D)**, and two-tailed Student's *t* test **(B and C)**. \* $p < 0.05$ ; \*\* $p < 0.01$ ; \*\*\* $p < 0.001$ ; \*\*\*\* $p < 0.0001$ .

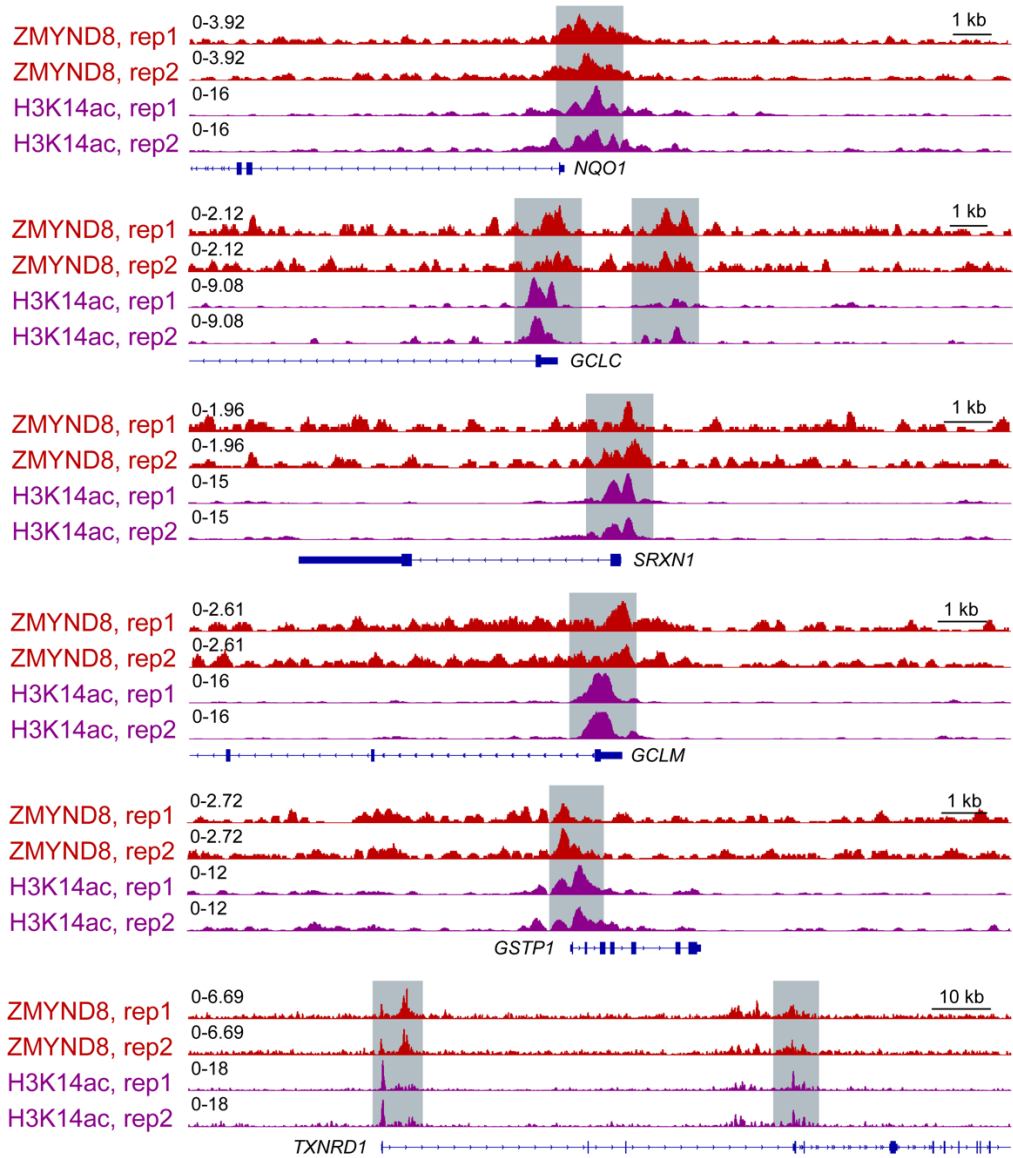

**Supplemental Figure 7. Enrichment of ZMYND8 and H3K14ac on NRF2 target genes.** Genome browser snapshots of ZMYND8 and H3K14ac ChIP-seq peaks on antioxidant genes. rep, replicate.

Pair-wise Gene Expression Correlation Analysis of *NFE2L2* and *ZMYND8*

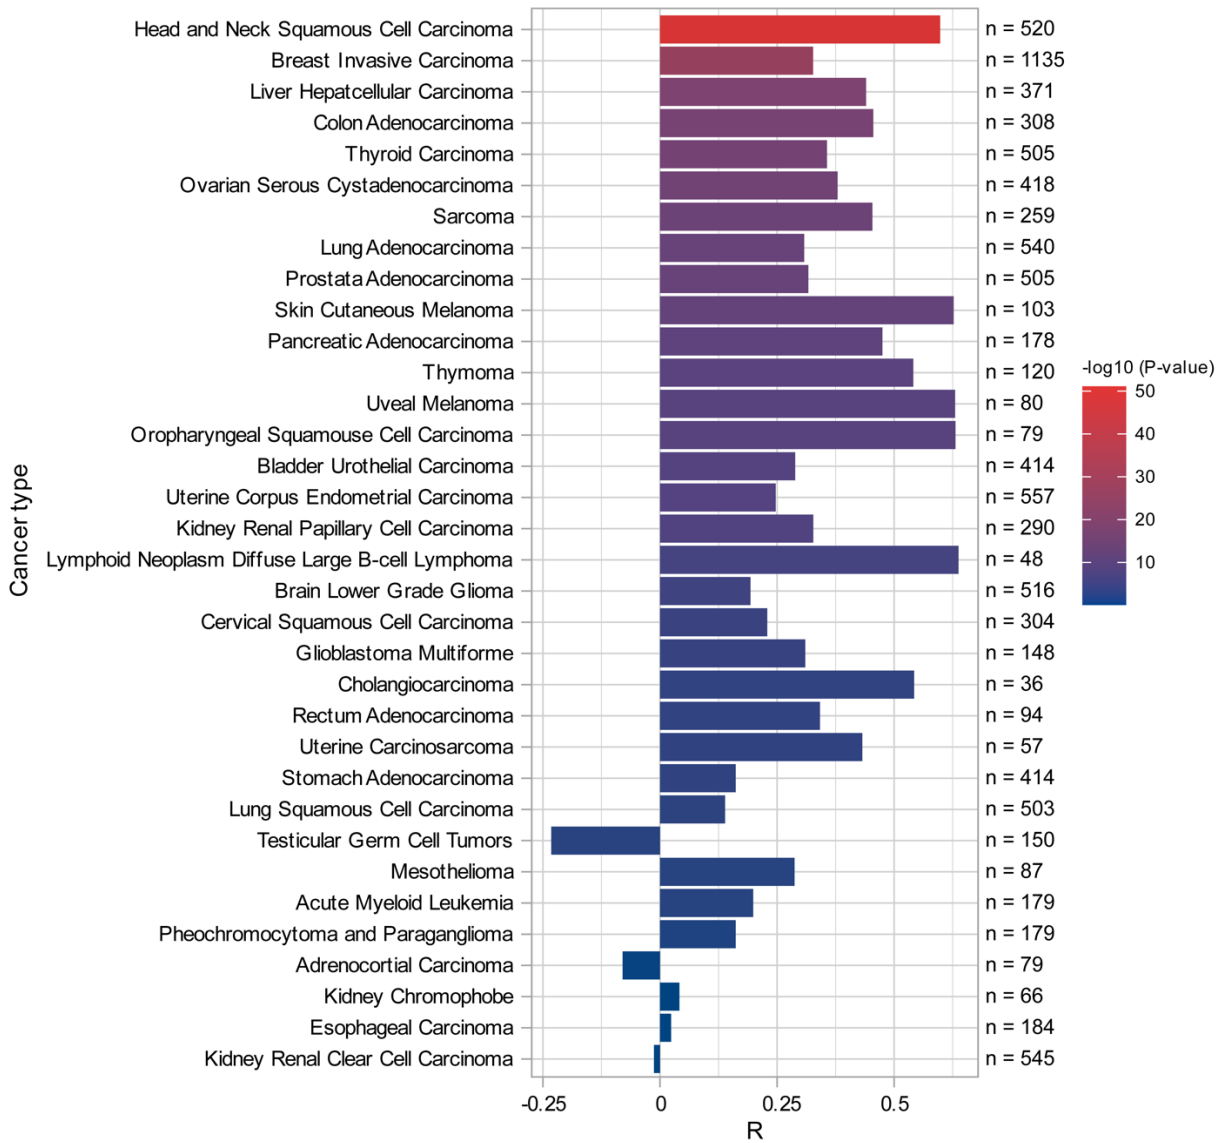

**Supplemental Figure 8. *ZMYND8* is positively co-expressed with *NFE2L2* in human tumors.** Pair-wise gene expression correlation analysis of *NFE2L2* and *ZMYND8* in human tumors from TCGA cohort (OncoDB,  $P < 0.05$  was considered as correlation).
